# Supplementary material
Source: PubMed Central journal article supplement (PMC10630168)
Supplement: jgc-20-10-716-S1.pdf [file jgc-20-10-716-S1.pdf]

## Supplemental Tables

**Table 1S Subgroup analysis: risk of primary and secondary outcomes among propensity score-matched cohort.**

| Variables                                     | Groups | Number of follow-up patients | Number of patients with events | Odds ratio (95% CI) | P-value | $P_{\text{interaction}}$ -value |
|-----------------------------------------------|--------|------------------------------|--------------------------------|---------------------|---------|---------------------------------|
| Outcome: target lesion revascularization      |        |                              |                                |                     |         |                                 |
| Age, yrs                                      |        |                              |                                |                     |         | 0.415                           |
| < 60                                          | DES    | 45                           | 6                              | Reference           |         |                                 |
|                                               | DCB    | 50                           | 3                              | 0.41 (0.10–1.77)    | 0.234   |                                 |
| ≥ 60                                          | DES    | 53                           | 10                             | 1.51 (0.50–4.55)    | 0.462   |                                 |
|                                               | DCB    | 52                           | 2                              | 0.26 (0.05–1.36)    | 0.110   |                                 |
| Sex                                           |        |                              |                                |                     |         | 0.804                           |
| Male                                          | DES    | 70                           | 12                             | Reference           |         |                                 |
|                                               | DCB    | 72                           | 4                              | 0.28 (0.09–0.93)    | 0.037   |                                 |
| Female                                        | DES    | 28                           | 4                              | 0.81 (0.24–2.75)    | 0.730   |                                 |
|                                               | DCB    | 30                           | 1                              | 0.17 (0.02–1.35)    | 0.093   |                                 |
| Diabetes mellitus                             |        |                              |                                |                     |         | 0.753                           |
| Without                                       | DES    | 71                           | 6                              | Reference           |         |                                 |
|                                               | DCB    | 66                           | 2                              | 0.29 (0.08–1.11)    | 0.070   |                                 |
| With                                          | DES    | 27                           | 10                             | 1.74 (0.56–5.38)    | 0.334   |                                 |
|                                               | DCB    | 36                           | 3                              | 0.36 (0.07–1.73)    | 0.202   |                                 |
| Clinical presentation                         |        |                              |                                |                     |         | 0.977                           |
| Stable angina                                 | DES    | 42                           | 4                              | Reference           |         |                                 |
|                                               | DCB    | 40                           | 1                              | 0.24 (0.03–2.28)    | 0.216   |                                 |
| Unstable angina                               | DES    | 56                           | 12                             | 2.59 (0.77–8.71)    | 0.124   |                                 |
|                                               | DCB    | 62                           | 4                              | 0.66 (0.15–2.78)    | 0.566   |                                 |
| Target vessel                                 |        |                              |                                |                     |         | 0.673                           |
| Left anterior descending                      | DES    | 76                           | 12                             | Reference           |         |                                 |
|                                               | DCB    | 75                           | 3                              | 0.22 (0.06–0.82)    | 0.024   |                                 |
| Left circumflex artery                        | DES    | 22                           | 4                              | 1.19 (0.34–4.12)    | 0.789   |                                 |
|                                               | DCB    | 27                           | 2                              | 0.43 (0.09–2.04)    | 0.287   |                                 |
| Outcome: major adverse cardiovascular events* |        |                              |                                |                     |         |                                 |
| Age, yrs                                      |        |                              |                                |                     |         | 0.386                           |
| < 60                                          | DES    | 45                           | 8                              | Reference           |         |                                 |
|                                               | DCB    | 50                           | 5                              | 0.51 (0.15–1.70)    | 0.277   |                                 |
| ≥ 60                                          | DES    | 53                           | 11                             | 1.21 (0.44–3.33)    | 0.711   |                                 |
|                                               | DCB    | 52                           | 3                              | 0.28 (0.07–1.14)    | 0.076   |                                 |
| Sex                                           |        |                              |                                |                     |         | 0.391                           |
| Male                                          | DES    | 70                           | 14                             | Reference           |         |                                 |
|                                               | DCB    | 72                           | 7                              | 0.43 (0.16–1.14)    | 0.091   |                                 |
| Female                                        | DES    | 28                           | 5                              | 0.87 (0.28–2.69)    | 0.809   |                                 |
|                                               | DCB    | 30                           | 1                              | 0.14 (0.02–1.10)    | 0.062   |                                 |
| Diabetes mellitus                             |        |                              |                                |                     |         | 0.897                           |
| Without                                       | DES    | 71                           | 12                             | Reference           |         |                                 |
|                                               | DCB    | 66                           | 4                              | 0.32 (0.10–1.04)    | 0.058   |                                 |
| With                                          | DES    | 27                           | 7                              | 1.72 (0.60–4.97)    | 0.316   |                                 |
|                                               | DCB    | 36                           | 4                              | 0.61 (0.18–2.06)    | 0.431   |                                 |

Continued

| Variables                                    | Groups | Number of follow-up patients | Number of patients with events | Odds ratio (95% CI) | P-value | $P_{\text{interaction}}$ -value |
|----------------------------------------------|--------|------------------------------|--------------------------------|---------------------|---------|---------------------------------|
| Clinical presentation                        |        |                              |                                |                     |         | 0.138                           |
| Stable angina                                | DES    | 42                           | 5                              | Reference           |         |                                 |
|                                              | DCB    | 40                           | 4                              | 0.82 (0.20–3.31)    | 0.783   |                                 |
| Unstable angina                              | DES    | 56                           | 14                             | 2.47 (0.81–7.50)    | 0.112   |                                 |
|                                              | DCB    | 62                           | 4                              | 0.51 (0.13–2.02)    | 0.339   |                                 |
| Target vessel                                |        |                              |                                |                     |         | 0.761                           |
| Left anterior descending                     | DES    | 76                           | 14                             | Reference           |         |                                 |
|                                              | DCB    | 75                           | 5                              | 0.32 (0.11–0.93)    | 0.036   |                                 |
| Left circumflex artery                       | DES    | 22                           | 5                              | 1.30 (0.41–4.13)    | 0.653   |                                 |
|                                              | DCB    | 27                           | 3                              | 0.55 (0.15–2.10)    | 0.385   |                                 |
| Outcome: cardiac death                       |        |                              |                                |                     |         |                                 |
| Age, yrs                                     |        |                              |                                |                     |         | 0.655                           |
| < 60                                         | DES    | 45                           | 2                              | Reference           |         |                                 |
|                                              | DCB    | 50                           | 1                              | 0.44 (0.04–5.01)    | 0.507   |                                 |
| ≥ 60                                         | DES    | 53                           | 1                              | 0.41 (0.04–4.72)    | 0.477   |                                 |
|                                              | DCB    | 52                           | 1                              | 0.42 (0.04–4.81)    | 0.487   |                                 |
| Sex                                          |        |                              |                                |                     |         | 0.267                           |
| Male                                         | DES    | 70                           | 2                              | Reference           |         |                                 |
|                                              | DCB    | 72                           | 2                              | 0.97 (0.13–7.09)    | 0.977   |                                 |
| Female                                       | DES    | 28                           | 1                              | 1.26 (0.11–14.47)   | 0.853   |                                 |
|                                              | DCB    | 30                           | 0                              |                     |         |                                 |
| Diabetes mellitus                            |        |                              |                                |                     |         | 0.859                           |
| Without                                      | DES    | 71                           | 2                              | Reference           |         |                                 |
|                                              | DCB    | 66                           | 1                              | 0.53 (0.05–5.99)    | 0.609   |                                 |
| With                                         | DES    | 27                           | 1                              | 1.33 (0.12–15.26)   | 0.820   |                                 |
|                                              | DCB    | 36                           | 1                              | 0.99 (0.09–11.25)   | 0.991   |                                 |
| Clinical presentation                        |        |                              |                                |                     |         | 0.073                           |
| Stable angina                                | DES    | 42                           | 1                              | Reference           |         |                                 |
|                                              | DCB    | 40                           | 2                              | 2.16 (0.19–24.78)   | 0.537   |                                 |
| Unstable angina                              | DES    | 56                           | 2                              | 1.52 (0.13–17.33)   | 0.737   |                                 |
|                                              | DCB    | 62                           | 0                              |                     |         |                                 |
| Target vessel                                |        |                              |                                |                     |         | 0.800                           |
| Left anterior descending                     | DES    | 76                           | 2                              | Reference           |         |                                 |
|                                              | DCB    | 75                           | 1                              | 0.50 (0.04–5.63)    | 0.575   |                                 |
| Left circumflex artery                       | DES    | 22                           | 1                              | 1.76 (0.15–20.40)   | 0.650   |                                 |
|                                              | DCB    | 27                           | 1                              | 1.42 (0.12–16.36)   | 0.777   |                                 |
| Outcome: target vessel myocardial infarction |        |                              |                                |                     |         |                                 |
| Age, yrs                                     |        |                              |                                |                     |         | 0.756                           |
| < 60                                         | DES    | 45                           | 1                              | Reference           |         |                                 |
|                                              | DCB    | 50                           | 1                              | 0.90 (0.05–14.79)   | 0.940   |                                 |
| ≥ 60                                         | DES    | 53                           | 2                              | 1.73 (0.15–19.68)   | 0.661   |                                 |
|                                              | DCB    | 52                           | 1                              | 0.86 (0.05–14.20)   | 0.918   |                                 |

| Variables                  | Groups | Number of follow-up patients | Number of patients with events | Odds ratio (95% CI) | P-value | <i>P</i> <sub>interaction</sub> -value |
|----------------------------|--------|------------------------------|--------------------------------|---------------------|---------|----------------------------------------|
| Sex                        |        |                              |                                |                     |         |                                        |
| Male                       | DES    | 70                           | 3                              | Reference           | 0.629   | 1.000                                  |
|                            | DCB    | 72                           | 2                              | 0.64 (0.10–3.94)    |         |                                        |
| Female                     | DES    | 28                           | 0                              |                     |         |                                        |
|                            | DCB    | 30                           | 0                              |                     |         |                                        |
| Diabetes mellitus          |        |                              |                                |                     |         |                                        |
| Without                    | DES    | 71                           | 2                              | Reference           | 0.609   | 0.859                                  |
|                            | DCB    | 66                           | 1                              | 0.53 (0.05–5.99)    |         |                                        |
| With                       | DES    | 27                           | 1                              | 1.33 (0.12–15.26)   | 0.820   |                                        |
|                            | DCB    | 36                           | 1                              | 0.99 (0.09–11.25)   | 0.991   |                                        |
| Clinical presentation      |        |                              |                                |                     |         |                                        |
| Stable angina              | DES    | 42                           | 2                              | Reference           | 0.592   | 0.765                                  |
|                            | DCB    | 40                           | 1                              | 0.51 (0.04–5.89)    |         |                                        |
| Unstable angina            | DES    | 56                           | 1                              | 0.36 (0.03–4.15)    | 0.415   |                                        |
|                            | DCB    | 62                           | 1                              | 0.33 (0.03–3.74)    | 0.369   |                                        |
| Target vessel              |        |                              |                                |                     |         |                                        |
| Left anterior descending   | DES    | 76                           | 2                              | Reference           | 0.662   | 1.000                                  |
|                            | DCB    | 75                           | 3                              | 0.67 (0.11–4.11)    |         |                                        |
| Left circumflex artery     | DES    | 22                           | 0                              |                     |         |                                        |
|                            | DCB    | 27                           | 0                              |                     |         |                                        |
| Outcome: vessel thrombosis |        |                              |                                |                     |         |                                        |
| Age, yrs                   |        |                              |                                |                     |         |                                        |
| < 60                       | DES    | 45                           | 1                              | Reference           | 0.661   | 1.000                                  |
|                            | DCB    | 50                           | 0                              |                     |         |                                        |
| ≥ 60                       | DES    | 53                           | 2                              | 1.73 (0.15–19.68)   |         |                                        |
|                            | DCB    | 52                           | 0                              |                     |         |                                        |
| Sex                        |        |                              |                                |                     |         |                                        |
| Male                       | DES    | 70                           | 3                              | Reference           |         | 1.000                                  |
|                            | DCB    | 72                           | 0                              |                     |         |                                        |
| Female                     | DES    | 28                           | 0                              |                     |         |                                        |
|                            | DCB    | 30                           | 0                              |                     |         |                                        |
| Diabetes mellitus          |        |                              |                                |                     |         |                                        |
| Without                    | DES    | 71                           | 2                              | Reference           | 0.820   | 1.000                                  |
|                            | DCB    | 66                           | 0                              |                     |         |                                        |
| With                       | DES    | 27                           | 1                              | 1.33 (0.12–15.26)   |         |                                        |
|                            | DCB    | 36                           | 0                              |                     |         |                                        |
| Clinical presentation      |        |                              |                                |                     |         |                                        |
| Stable angina              | DES    | 42                           | 2                              | Reference           | 0.416   | 1.000                                  |
|                            | DCB    | 40                           | 0                              |                     |         |                                        |
| Unstable angina            | DES    | 56                           | 1                              | 0.36 (0.03–4.15)    |         |                                        |
|                            | DCB    | 62                           | 0                              |                     |         |                                        |
| Target vessel              |        |                              |                                |                     |         |                                        |
| Left anterior descending   | DES    | 76                           | 3                              | Reference           |         | 1.000                                  |
|                            | DCB    | 75                           | 0                              |                     |         |                                        |
| Left circumflex artery     | DES    | 22                           | 0                              |                     |         |                                        |
|                            | DCB    | 27                           | 0                              |                     |         |                                        |

\*Referred to major adverse cardiovascular events defined as the composite outcome of cardiac death, target vessel myocardial infarction, target lesion revascularization, and vessel thrombosis. DCB: drug-coated balloons; DES: drug-eluting stents.

**Table 2S DCB versus precisely ostial stenting: risk of primary and secondary outcomes.**

| Variables                            | Number of patients | Number of follow-up patients | Number of patients with events | Event rate | Odds ratio (95% CI) | P-value |
|--------------------------------------|--------------------|------------------------------|--------------------------------|------------|---------------------|---------|
| Target lesion revascularization      |                    |                              |                                |            |                     |         |
| DCB                                  | 89                 | 87                           | 5                              | 5.75%      | 0.314 (0.108–0.913) | 0.027   |
| Precisely ostial stenting            | 89                 | 86                           | 14                             | 16.28%     | Reference           |         |
| Major adverse cardiovascular events* |                    |                              |                                |            |                     |         |
| DCB                                  | 89                 | 87                           | 8                              | 9.20%      | 0.411 (0.167–1.011) | 0.048   |
| Precisely ostial stenting            | 89                 | 86                           | 17                             | 19.77%     | Reference           |         |
| Cardiac death                        |                    |                              |                                |            |                     |         |
| DCB                                  | 89                 | 87                           | 2                              | 2.30%      | 0.651 (0.106–3.996) | 0.682   |
| Precisely ostial stenting            | 89                 | 86                           | 3                              | 3.49%      | Reference           |         |
| Target vessel myocardial infarction  |                    |                              |                                |            |                     |         |
| DCB                                  | 89                 | 87                           | 2                              | 2.30%      | 0.988 (0.136–7.179) | 1.000   |
| Precisely ostial stenting            | 89                 | 86                           | 2                              | 2.33%      | Reference           |         |
| Vessel thrombosis                    |                    |                              |                                |            |                     |         |
| DCB                                  | 89                 | 87                           | 0                              | 0          | 0.977 (0.945–1.009) | 0.246   |
| Precisely ostial stenting            | 89                 | 86                           | 2                              | 2.33%      | Reference           |         |

\*Referred to major adverse cardiovascular events defined as the composite outcome of cardiac death, target vessel myocardial infarction, target lesion revascularization, and vessel thrombosis. DCB: drug-coated balloons.

**Table 3S DCB versus crossover stenting: risk of primary and secondary outcomes.**

| Variables                            | Number of patients | Number of follow-up patients | Number of patients with events | Event rate | Odds ratio (95% CI)  | P-value |
|--------------------------------------|--------------------|------------------------------|--------------------------------|------------|----------------------|---------|
| Target lesion revascularization      |                    |                              |                                |            |                      |         |
| DCB                                  | 89                 | 84                           | 3                              | 3.57%      | 0.570 (0.132–2.468)  | 0.493   |
| Crossover stenting                   | 89                 | 82                           | 5                              | 6.10%      | Reference            |         |
| Major adverse cardiovascular events* |                    |                              |                                |            |                      |         |
| DCB                                  | 89                 | 84                           | 5                              | 5.95%      | 0.802 (0.235–2.737)  | 0.724   |
| Crossover stenting                   | 89                 | 82                           | 6                              | 7.32%      | Reference            |         |
| Cardiac death                        |                    |                              |                                |            |                      |         |
| DCB                                  | 89                 | 84                           | 1                              | 1.19%      | 0.976 (0.060–15.867) | 1.000   |
| Crossover stenting                   | 89                 | 82                           | 1                              | 1.22%      | Reference            |         |
| Target vessel myocardial infarction  |                    |                              |                                |            |                      |         |
| DCB                                  | 89                 | 84                           | 1                              | 1.19%      | 1.012 (0.989–1.036)  | 1.000   |
| Crossover stenting                   | 89                 | 82                           | 0                              | 0          | Reference            |         |
| Vessel thrombosis                    |                    |                              |                                |            |                      |         |
| DCB                                  | 89                 | 84                           | 0                              | 0          |                      |         |
| Crossover stenting                   | 89                 | 82                           | 0                              | 0          |                      |         |

\*Referred to major adverse cardiovascular events defined as the composite outcome of cardiac death, target vessel myocardial infarction, target lesion revascularization, and vessel thrombosis. DCB: drug-coated balloons.

# Supplemental Figure

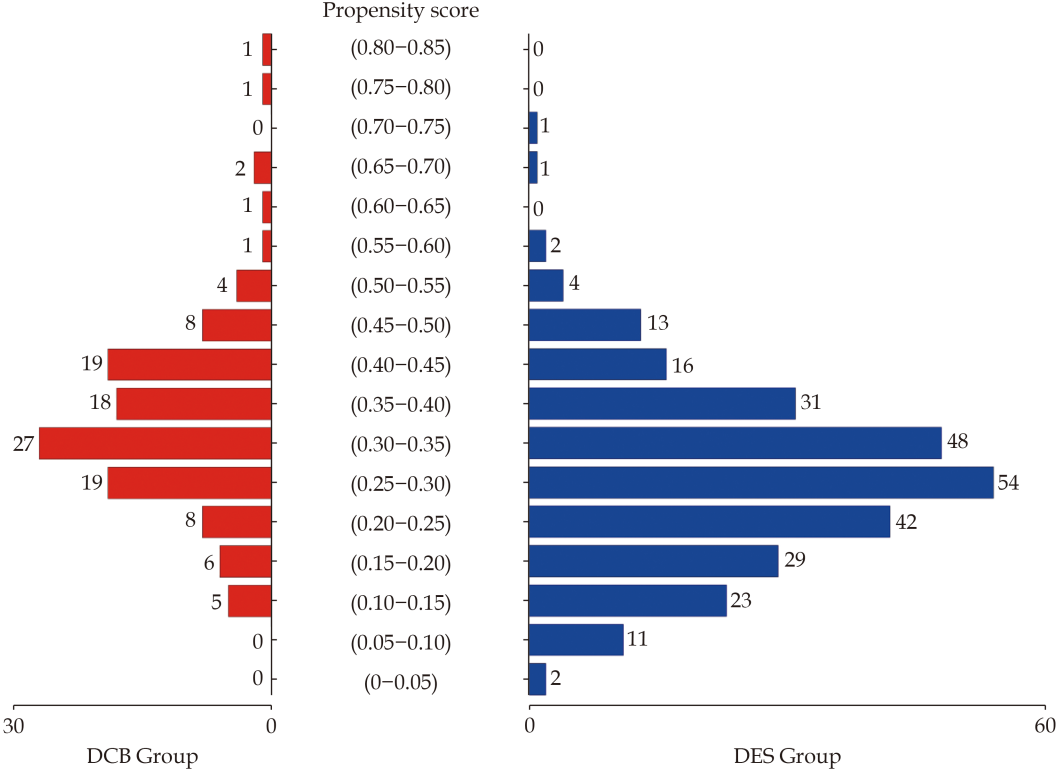

**Figure 1S Propensity score based on spline smoothing.** DCB: drug-coated balloons; DES: drug-eluting stents.
